# Supplementary material
Source: publisher site journal article supplement (https://www.dovepress.com/article/255532)
Supplement: Supplementary file 1 [file get_supplementary_file.php]

Supplementary material: vital signs.

Table S1. Blood pressure descriptive.

|  | | | N | Min | Max | Mean | SD | Perc. 25 | Median | Perc. 75 |
| --- | --- | --- | --- | --- | --- | --- | --- | --- | --- | --- |
| Blood pressure systolic (mmHg) - baseline | Treatment administered | Penthrox | 35 | 100 | 190 | 138 | 20 | 128 | 130 | 141 |
| Ketoprofen | 3 | 120 | 130 | 127 | 6 | 120 | 130 | 130 |
| Paracetamol | 16 | 100 | 160 | 129 | 19 | 120 | 128 | 138 |
| Morphine | 15 | 105 | 210 | 156 | 33 | 130 | 154 | 179 |
| Total | 69 | 100 | 210 | 139 | 25 | 120 | 130 | 154 |
| Blood pressure systolic (mmHg) - 10 min | Treatment administered | Penthrox | 34 | 100 | 187 | 136 | 20 | 120 | 140 | 146 |
| Ketoprofen | 3 | 120 | 130 | 127 | 6 | 120 | 130 | 130 |
| Paracetamol | 15 | 100 | 170 | 134 | 17 | 120 | 130 | 150 |
| Morphine | 15 | 110 | 193 | 146 | 27 | 130 | 140 | 164 |
| Total | 67 | 100 | 193 | 138 | 21 | 120 | 135 | 150 |
| Blood pressure systolic (mmHg) - 30 min | Treatment administered | Penthrox | 35 | 110 | 194 | 137 | 21 | 120 | 135 | 148 |
| Ketoprofen | 3 | 120 | 125 | 122 | 3 | 120 | 120 | 125 |
| Paracetamol | 16 | 100 | 180 | 132 | 20 | 120 | 124 | 141 |
| Morphine | 15 | 110 | 217 | 148 | 28 | 120 | 145 | 160 |
| Total | 69 | 100 | 217 | 138 | 23 | 120 | 135 | 150 |
| Blood pressure diastolic (mmHg) - baseline | Treatment administered | Penthrox | 35 | 60 | 95 | 79 | 9 | 70 | 80 | 90 |
| Ketoprofen | 3 | 70 | 80 | 73 | 6 | 70 | 70 | 80 |
| Paracetamol | 16 | 60 | 90 | 76 | 10 | 70 | 80 | 83 |
| Morphine | 15 | 50 | 100 | 80 | 14 | 75 | 80 | 90 |
| Total | 69 | 50 | 100 | 79 | 10 | 70 | 80 | 86 |
| Blood pressure diastolic (mmHg) - 10 min | Treatment administered | Penthrox | 34 | 60 | 95 | 78 | 9 | 70 | 80 | 83 |
| Ketoprofen | 3 | 70 | 80 | 73 | 6 | 70 | 70 | 80 |
| Paracetamol | 15 | 60 | 100 | 77 | 10 | 70 | 80 | 84 |
| Morphine | 15 | 45 | 94 | 76 | 13 | 70 | 80 | 85 |
| Total | 67 | 45 | 100 | 77 | 10 | 70 | 80 | 83 |
| Blood pressure diastolic (mmHg) - 30 min | Treatment administered | Penthrox | 35 | 60 | 94 | 79 | 9 | 70 | 80 | 90 |
| Ketoprofen | 3 | 60 | 80 | 67 | 12 | 60 | 60 | 80 |
| Paracetamol | 16 | 60 | 98 | 77 | 10 | 70 | 76 | 83 |
| Morphine | 15 | 49 | 95 | 75 | 13 | 65 | 75 | 89 |
| Total | 69 | 49 | 98 | 77 | 10 | 70 | 79 | 85 |
| Heart rate (bpm) - baseline | Treatment administered | Penthrox | 34 | 57 | 104 | 77 | 11 | 72 | 75 | 82 |
| Ketoprofen | 3 | 60 | 75 | 68 | 8 | 60 | 70 | 75 |
| Paracetamol | 15 | 50 | 90 | 74 | 12 | 70 | 75 | 83 |
| Morphine | 15 | 60 | 95 | 77 | 10 | 70 | 80 | 82 |
| Total | 67 | 50 | 104 | 76 | 11 | 70 | 76 | 82 |
| Heart rate (bpm) - 10 min | Treatment administered | Penthrox | 34 | 54 | 100 | 78 | 10 | 72 | 79 | 82 |
| Ketoprofen | 3 | 62 | 80 | 73 | 9 | 62 | 76 | 80 |
| Paracetamol | 15 | 60 | 90 | 76 | 9 | 70 | 75 | 85 |
| Morphine | 15 | 58 | 87 | 74 | 8 | 71 | 76 | 80 |
| Total | 67 | 54 | 100 | 76 | 9 | 70 | 76 | 80 |
| Heart rate (bpm) - 30 min | Treatment administered | Penthrox | 35 | 57 | 96 | 74 | 9 | 68 | 74 | 80 |
| Ketoprofen | 3 | 60 | 75 | 67 | 8 | 60 | 65 | 75 |
| Paracetamol | 16 | 60 | 90 | 75 | 8 | 70 | 74 | 80 |
| Morphine | 15 | 56 | 94 | 74 | 9 | 67 | 74 | 80 |
| Total | 69 | 56 | 96 | 74 | 9 | 68 | 74 | 80 |
| Respiratory rate (bpm) - baseline | Treatment administered | Penthrox | 32 | 12 | 22 | 15 | 3 | 13 | 14 | 17 |
| Ketoprofen | 3 | 13 | 20 | 16 | 4 | 13 | 16 | 20 |
| Paracetamol | 15 | 12 | 20 | 16 | 3 | 13 | 16 | 18 |
| Morphine | 13 | 13 | 24 | 17 | 3 | 14 | 18 | 18 |
| Total | 63 | 12 | 24 | 16 | 3 | 13 | 14 | 18 |
| Respiratory rate (bpm) - 10 min | Treatment administered | Penthrox | 33 | 12 | 22 | 15 | 3 | 12 | 14 | 16 |
| Ketoprofen | 3 | 13 | 22 | 17 | 5 | 13 | 16 | 22 |
| Paracetamol | 15 | 12 | 20 | 16 | 3 | 13 | 16 | 18 |
| Morphine | 15 | 12 | 20 | 17 | 3 | 14 | 18 | 20 |
| Total | 66 | 12 | 22 | 16 | 3 | 13 | 15 | 18 |
| Respiratory rate (bpm) - 30 min | Treatment administered | Penthrox | 34 | 12 | 20 | 15 | 3 | 12 | 14 | 16 |
| Ketoprofen | 3 | 13 | 20 | 16 | 4 | 13 | 14 | 20 |
| Paracetamol | 15 | 12 | 22 | 16 | 4 | 13 | 16 | 20 |
| Morphine | 15 | 12 | 20 | 17 | 2 | 14 | 17 | 18 |
| Total | 67 | 12 | 22 | 15 | 3 | 13 | 14 | 18 |

Table S2. Blood pressure systolic, paired Samples Statistics.

| Treatment administered | | | Mean | N | Std. Deviation | Std. Error Mean |
| --- | --- | --- | --- | --- | --- | --- |
| Morphine | Pair 1 | Blood pressure systolic (mmHg) - 10 min | 146.47 | 15 | 26.928 | 6.953 |
| Blood pressure systolic (mmHg) - baseline | 156.20 | 15 | 33.044 | 8.532 |
| Pair 2 | Blood pressure systolic (mmHg) - 30 min | 148.47 | 15 | 27.918 | 7.208 |
| Blood pressure systolic (mmHg) - baseline | 156.20 | 15 | 33.044 | 8.532 |
| Paracetamol | Pair 1 | Blood pressure systolic (mmHg) - 10 min | 134.00 | 15 | 17.025 | 4.396 |
| Blood pressure systolic (mmHg) - baseline | 128.47 | 15 | 19.353 | 4.997 |
| Pair 2 | Blood pressure systolic (mmHg) - 30 min | 131.81 | 16 | 19.820 | 4.955 |
| Blood pressure systolic (mmHg) - baseline | 128.56 | 16 | 18.701 | 4.675 |
| Ketoprofen | Pair 1 | Blood pressure systolic (mmHg) - 10 min | 126.67a | 3 | 5.774 | 3.333 |
| Blood pressure systolic (mmHg) - baseline | 126.67a | 3 | 5.774 | 3.333 |
| Pair 2 | Blood pressure systolic (mmHg) - 30 min | 121.67 | 3 | 2.887 | 1.667 |
| Blood pressure systolic (mmHg) - baseline | 126.67 | 3 | 5.774 | 3.333 |
| Penthrox | Pair 1 | Blood pressure systolic (mmHg) - 10 min | 136.29 | 34 | 20.088 | 3.445 |
| Blood pressure systolic (mmHg) - baseline | 137.53 | 34 | 20.782 | 3.564 |
| Pair 2 | Blood pressure systolic (mmHg) - 30 min | 137.14 | 35 | 21.374 | 3.613 |
| Blood pressure systolic (mmHg) - baseline | 137.60 | 35 | 20.478 | 3.461 |
| a. The correlation and t cannot be computed because the standard error of the difference is 0. | | | | | | |

Table S3. Blood pressure systolic variation. Paired Samples Test

| Treatment administered | | | Paired Differences | | | | | t | df | Sig. (2-tailed) |
| --- | --- | --- | --- | --- | --- | --- | --- | --- | --- | --- |
| Mean | Std. Deviation | Std. Error Mean | 95% Confidence Interval of the Difference | |
| Lower | Upper |
| Morphine | Pair 1 | Blood pressure systolic (mmHg) - 10 min - Blood pressure systolic (mmHg) - baseline | -9.733 | 14.699 | 3.795 | -17.873 | -1.593 | -2.565 | 14 | .022 |
| Pair 2 | Blood pressure systolic (mmHg) - 30 min - Blood pressure systolic (mmHg) - baseline | -7.733 | 16.020 | 4.136 | -16.605 | 1.138 | -1.870 | 14 | .083 |
| Paracetamol | Pair 1 | Blood pressure systolic (mmHg) - 10 min - Blood pressure systolic (mmHg) - baseline | 5.533 | 15.937 | 4.115 | -3.292 | 14.359 | 1.345 | 14 | .200 |
| Pair 2 | Blood pressure systolic (mmHg) - 30 min - Blood pressure systolic (mmHg) - baseline | 3.250 | 16.615 | 4.154 | -5.604 | 12.104 | .782 | 15 | .446 |
| Ketoprofen | Pair 2 | Blood pressure systolic (mmHg) - 30 min - Blood pressure systolic (mmHg) - baseline | -5.000 | 5.000 | 2.887 | -17.421 | 7.421 | -1.732 | 2 | .225 |
| Penthrox | Pair 1 | Blood pressure systolic (mmHg) - 10 min - Blood pressure systolic (mmHg) - baseline | -1.235 | 17.076 | 2.928 | -7.193 | 4.723 | -.422 | 33 | .676 |
| Pair 2 | Blood pressure systolic (mmHg) - 30 min - Blood pressure systolic (mmHg) - baseline | -.457 | 20.464 | 3.459 | -7.487 | 6.573 | -.132 | 34 | .896 |

Table S4. Blood pressure diastolic*.* Paired Samples Statistics.

| Treatment administered | | | Mean | N | Std. Deviation | Std. Error Mean |
| --- | --- | --- | --- | --- | --- | --- |
| Morphine | Pair 1 | Blood pressure diastolic (mmHg) - 10 min | 76.40 | 15 | 13.157 | 3.397 |
| Blood pressure diastolic (mmHg) - baseline | 80.07 | 15 | 14.210 | 3.669 |
| Pair 2 | Blood pressure diastolic (mmHg) - 30 min | 75.07 | 15 | 13.237 | 3.418 |
| Blood pressure diastolic (mmHg) - baseline | 80.07 | 15 | 14.210 | 3.669 |
| Paracetamol | Pair 1 | Blood pressure diastolic (mmHg) - 10 min | 77.33 | 15 | 10.417 | 2.690 |
| Blood pressure diastolic (mmHg) - baseline | 76.53 | 15 | 10.113 | 2.611 |
| Pair 2 | Blood pressure diastolic (mmHg) - 30 min | 76.75 | 16 | 9.546 | 2.387 |
| Blood pressure diastolic (mmHg) - baseline | 76.13 | 16 | 9.905 | 2.476 |
| Ketoprofen | Pair 1 | Blood pressure diastolic (mmHg) - 10 min | 73.33a | 3 | 5.774 | 3.333 |
| Blood pressure diastolic (mmHg) - baseline | 73.33a | 3 | 5.774 | 3.333 |
| Pair 2 | Blood pressure diastolic (mmHg) - 30 min | 66.67 | 3 | 11.547 | 6.667 |
| Blood pressure diastolic (mmHg) - baseline | 73.33 | 3 | 5.774 | 3.333 |
| Penthrox | Pair 1 | Blood pressure diastolic (mmHg) - 10 min | 78.03 | 34 | 8.823 | 1.513 |
| Blood pressure diastolic (mmHg) - baseline | 79.47 | 34 | 9.182 | 1.575 |
| Pair 2 | Blood pressure diastolic (mmHg) - 30 min | 78.74 | 35 | 9.089 | 1.536 |
| Blood pressure diastolic (mmHg) - baseline | 79.49 | 35 | 9.047 | 1.529 |
| a. The correlation and t cannot be computed because the standard error of the difference is 0. | | | | | | |

Table S5. Blood pressure diastolic. Paired Samples Test.

| Treatment administered | | | Paired Differences | | | | | t | df | Sig. (2-tailed) |
| --- | --- | --- | --- | --- | --- | --- | --- | --- | --- | --- |
| Mean | Std. Deviation | Std. Error Mean | 95% Confidence Interval of the Difference | |
| Lower | Upper |
| Morphine | Pair 1 | Blood pressure diastolic (mmHg) - 10 min - Blood pressure diastolic (mmHg) - baseline | -3.667 | 14.647 | 3.782 | -11.778 | 4.444 | -.970 | 14 | .349 |
| Pair 2 | Blood pressure diastolic (mmHg) - 30 min - Blood pressure diastolic (mmHg) - baseline | -5.000 | 14.353 | 3.706 | -12.948 | 2.948 | -1.349 | 14 | .199 |
| Paracetamol | Pair 1 | Blood pressure diastolic (mmHg) - 10 min - Blood pressure diastolic (mmHg) - baseline | .800 | 10.611 | 2.740 | -5.076 | 6.676 | .292 | 14 | .775 |
| Pair 2 | Blood pressure diastolic (mmHg) - 30 min - Blood pressure diastolic (mmHg) - baseline | .625 | 8.074 | 2.018 | -3.677 | 4.927 | .310 | 15 | .761 |
| Ketoprofen | Pair 2 | Blood pressure diastolic (mmHg) - 30 min - Blood pressure diastolic (mmHg) - baseline | -6.667 | 5.774 | 3.333 | -21.009 | 7.676 | -2.000 | 2 | .184 |
| Penthrox | Pair 1 | Blood pressure diastolic (mmHg) - 10 min - Blood pressure diastolic (mmHg) - baseline | -1.441 | 8.035 | 1.378 | -4.245 | 1.362 | -1.046 | 33 | .303 |
| Pair 2 | Blood pressure diastolic (mmHg) - 30 min - Blood pressure diastolic (mmHg) - baseline | -.743 | 7.663 | 1.295 | -3.375 | 1.890 | -.573 | 34 | .570 |

Table S6. Heart rate. Paired Samples Statistics

| Treatment administered | | | Mean | N | Std. Deviation | Std. Error Mean |
| --- | --- | --- | --- | --- | --- | --- |
| Morphine | Pair 1 | Heart rate (bpm) - 10 min | 74.47 | 15 | 8.228 | 2.124 |
| Heart rate (bpm) - baseline | 76.80 | 15 | 9.923 | 2.562 |
| Pair 2 | Heart rate (bpm) - 30 min | 74.20 | 15 | 9.382 | 2.423 |
| Heart rate (bpm) - baseline | 76.80 | 15 | 9.923 | 2.562 |
| Paracetamol | Pair 1 | Heart rate (bpm) - 10 min | 75.67 | 15 | 9.116 | 2.354 |
| Heart rate (bpm) - baseline | 74.20 | 15 | 11.857 | 3.062 |
| Pair 2 | Heart rate (bpm) - 30 min | 74.33 | 15 | 8.608 | 2.223 |
| Heart rate (bpm) - baseline | 74.20 | 15 | 11.857 | 3.062 |
| Ketoprofen | Pair 1 | Heart rate (bpm) - 10 min | 72.67 | 3 | 9.452 | 5.457 |
| Heart rate (bpm) - baseline | 68.33 | 3 | 7.638 | 4.410 |
| Pair 2 | Heart rate (bpm) - 30 min | 66.67 | 3 | 7.638 | 4.410 |
| Heart rate (bpm) - baseline | 68.33 | 3 | 7.638 | 4.410 |
| Penthrox | Pair 1 | Heart rate (bpm) - 10 min | 77.53 | 34 | 10.296 | 1.766 |
| Heart rate (bpm) - baseline | 77.18 | 34 | 10.695 | 1.834 |
| Pair 2 | Heart rate (bpm) - 30 min | 74.26 | 34 | 8.698 | 1.492 |
| Heart rate (bpm) - baseline | 77.18 | 34 | 10.695 | 1.834 |

Table S7. Heart rate variation. Paired Samples Test

| Treatment administered | | | Paired Differences | | | | | t | df | Sig. (2-tailed) |
| --- | --- | --- | --- | --- | --- | --- | --- | --- | --- | --- |
| Mean | Std. Deviation | Std. Error Mean | 95% Confidence Interval of the Difference | |
| Lower | Upper |
| Morphine | Pair 1 | Heart rate (bpm) - 10 min - Heart rate (bpm) - baseline | -2.333 | 5.740 | 1.482 | -5.512 | .846 | -1.574 | 14 | .138 |
| Pair 2 | Heart rate (bpm) - 30 min - Heart rate (bpm) - baseline | -2.600 | 5.435 | 1.403 | -5.610 | .410 | -1.853 | 14 | .085 |
| Paracetamol | Pair 1 | Heart rate (bpm) - 10 min - Heart rate (bpm) - baseline | 1.467 | 9.531 | 2.461 | -3.811 | 6.745 | .596 | 14 | .561 |
| Pair 2 | Heart rate (bpm) - 30 min - Heart rate (bpm) - baseline | .133 | 7.220 | 1.864 | -3.865 | 4.131 | .072 | 14 | .944 |
| Ketoprofen | Pair 1 | Heart rate (bpm) - 10 min - Heart rate (bpm) - baseline | 4.333 | 2.082 | 1.202 | -.838 | 9.504 | 3.606 | 2 | .069 |
| Pair 2 | Heart rate (bpm) - 30 min - Heart rate (bpm) - baseline | -1.667 | 7.638 | 4.410 | -20.640 | 17.306 | -.378 | 2 | .742 |
| Penthrox | Pair 1 | Heart rate (bpm) - 10 min - Heart rate (bpm) - baseline | .353 | 7.730 | 1.326 | -2.344 | 3.050 | .266 | 33 | .792 |
| Pair 2 | Heart rate (bpm) - 30 min - Heart rate (bpm) - baseline | -2.912 | 8.973 | 1.539 | -6.042 | .219 | -1.892 | 33 | .067 |

Table S8. Respiratory rate. Paired Samples Statistics

| Treatment administered | | | Mean | N | Std. Deviation | Std. Error Mean |
| --- | --- | --- | --- | --- | --- | --- |
| Morphine | Pair 1 | Respiratory rate (bpm) - 10 min | 17.46 | 13 | 2.727 | .756 |
| Respiratory rate (bpm) - baseline | 17.46 | 13 | 3.282 | .910 |
| Pair 2 | Respiratory rate (bpm) - 30 min | 16.92 | 13 | 2.362 | .655 |
| Respiratory rate (bpm) - baseline | 17.46 | 13 | 3.282 | .910 |
| Paracetamol | Pair 1 | Respiratory rate (bpm) - 10 min | 16.14 | 14 | 2.742 | .733 |
| Respiratory rate (bpm) - baseline | 15.79 | 14 | 2.833 | .757 |
| Pair 2 | Respiratory rate (bpm) - 30 min | 16.47 | 15 | 3.543 | .915 |
| Respiratory rate (bpm) - baseline | 15.60 | 15 | 2.823 | .729 |
| Ketoprofen | Pair 1 | Respiratory rate (bpm) - 10 min | 17.00 | 3 | 4.583 | 2.646 |
| Respiratory rate (bpm) - baseline | 16.33 | 3 | 3.512 | 2.028 |
| Pair 2 | Respiratory rate (bpm) - 30 min | 15.67 | 3 | 3.786 | 2.186 |
| Respiratory rate (bpm) - baseline | 16.33 | 3 | 3.512 | 2.028 |
| Penthrox | Pair 1 | Respiratory rate (bpm) - 10 min | 14.67 | 30 | 3.032 | .554 |
| Respiratory rate (bpm) - baseline | 14.77 | 30 | 2.979 | .544 |
| Pair 2 | Respiratory rate (bpm) - 30 min | 14.29 | 31 | 2.519 | .452 |
| Respiratory rate (bpm) - baseline | 14.71 | 31 | 2.946 | .529 |

Table S9. Respiratory rate variation. Paired Samples Test

| Treatment administered | | | Paired Differences | | | | | t | df | Sig. (2-tailed) |
| --- | --- | --- | --- | --- | --- | --- | --- | --- | --- | --- |
| Mean | Std. Deviation | Std. Error Mean | 95% Confidence Interval of the Difference | |
| Lower | Upper |
| Morphine | Pair 1 | Respiratory rate (bpm) - 10 min - Respiratory rate (bpm) - baseline | .000 | 2.739 | .760 | -1.655 | 1.655 | .000 | 12 | 1.000 |
| Pair 2 | Respiratory rate (bpm) - 30 min - Respiratory rate (bpm) - baseline | -.538 | 2.367 | .656 | -1.969 | .892 | -.820 | 12 | .428 |
| Paracetamol | Pair 1 | Respiratory rate (bpm) - 10 min - Respiratory rate (bpm) - baseline | .357 | 1.082 | .289 | -.267 | .982 | 1.235 | 13 | .239 |
| Pair 2 | Respiratory rate (bpm) - 30 min - Respiratory rate (bpm) - baseline | .867 | 1.598 | .413 | -.018 | 1.751 | 2.101 | 14 | .054 |
| Ketoprofen | Pair 1 | Respiratory rate (bpm) - 10 min - Respiratory rate (bpm) - baseline | .667 | 1.155 | .667 | -2.202 | 3.535 | 1.000 | 2 | .423 |
| Pair 2 | Respiratory rate (bpm) - 30 min - Respiratory rate (bpm) - baseline | -.667 | 1.155 | .667 | -3.535 | 2.202 | -1.000 | 2 | .423 |
| Penthrox | Pair 1 | Respiratory rate (bpm) - 10 min - Respiratory rate (bpm) - baseline | -.100 | 2.006 | .366 | -.849 | .649 | -.273 | 29 | .787 |
| Pair 2 | Respiratory rate (bpm) - 30 min - Respiratory rate (bpm) - baseline | -.419 | 1.544 | .277 | -.986 | .147 | -1.512 | 30 | .141 |
